# Supplementary material for: Heat-Induced Interactions between Whey Protein and Inulin and Changes in Physicochemical and Antioxidative Properties of the Complexes
Source: PubMed Central journal article supplement (PMC6747464; doi:10.3390/ijms20174089), 2019-08-21
Supplement: ijms-20-04089-s001.pdf [file ijms-20-04089-s001.pdf]

Table 1 Changes in DPPH and ABTS scavenging abilities of whey protein and inulin mixture after dry heating

|                  | Untreated sample           |                            |                            |                            | Dry-heated sample           |                             |                            |                            |
|------------------|----------------------------|----------------------------|----------------------------|----------------------------|-----------------------------|-----------------------------|----------------------------|----------------------------|
|                  | 1 mg/mL                    | 2.5 mg/mL                  | 5 mg/mL                    | 10 mg/mL                   | 1 mg/mL                     | 2.5 mg/mL                   | 5 mg/mL                    | 10 mg/mL                   |
| <b>DPPH</b>      |                            |                            |                            |                            |                             |                             |                            |                            |
| WPI: inulin =3:1 | 15.48 ± 1.07 <sup>Aa</sup> | 34.68 ± 1.14 <sup>Aa</sup> | 44.91 ± 1.30 <sup>Aa</sup> | 52.24 ± 3.52 <sup>Aa</sup> | 14.64 ± 1.85 <sup>Aa</sup>  | 24.00 ± 2.35 <sup>Ba</sup>  | 40.83 ± 1.24 <sup>Ba</sup> | 48.69 ± 2.89 <sup>Ba</sup> |
| WPI: inulin =2:1 | 11.27 ± 0.99 <sup>Ab</sup> | 30.81 ± 0.98 <sup>Ab</sup> | 43.30 ± 2.63 <sup>Aa</sup> | 48.89 ± 1.59 <sup>Ab</sup> | 13.72 ± 1.17 <sup>Bbc</sup> | 24.94 ± 3.08 <sup>Bab</sup> | 41.24 ± 2.32 <sup>Ba</sup> | 49.69 ± 1.55 <sup>Aa</sup> |
| WPI: inulin =1:1 | 2.17 ± 0.37 <sup>Ac</sup>  | 22.92 ± 1.36 <sup>Ac</sup> | 36.52 ± 2.29 <sup>Ab</sup> | 45.38 ± 1.79 <sup>Aa</sup> | 12.12 ± 1.05 <sup>Bc</sup>  | 25.85 ± 1.22 <sup>Bbc</sup> | 36.19 ± 1.00 <sup>Aa</sup> | 48.87 ± 1.78 <sup>Ba</sup> |
| WPI: inulin =1:2 | 2.01 ± 0.28 <sup>Ac</sup>  | 12.87 ± 0.68 <sup>Ad</sup> | 29.35 ± 1.31 <sup>Ac</sup> | 40.63 ± 2.03 <sup>Ad</sup> | 12.39 ± 0.91 <sup>Bc</sup>  | 26.20 ± 0.97 <sup>Bb</sup>  | 41.34 ± 1.70 <sup>Ba</sup> | 56.96 ± 1.69 <sup>Bb</sup> |
| WPI: inulin =1:3 | 2.68 ± 0.34 <sup>Ac</sup>  | 3.61 ± 0.29 <sup>Ac</sup>  | 20.15 ± 1.85 <sup>Ad</sup> | 32.88 ± 2.41 <sup>Ac</sup> | 12.87 ± 1.77 <sup>Bc</sup>  | 23.79 ± 0.78 <sup>Bad</sup> | 39.05 ± 0.85 <sup>Bb</sup> | 53.70 ± 1.68 <sup>Bc</sup> |
| <b>ABTS</b>      |                            |                            |                            |                            |                             |                             |                            |                            |
| WPI: inulin =3:1 | 14.47 ± 0.62 <sup>Aa</sup> | 37.84 ± 1.59 <sup>Aa</sup> | 70.65 ± 1.64 <sup>Aa</sup> | 83.72 ± 3.07 <sup>Aa</sup> | 30.60 ± 2.29 <sup>Ba</sup>  | 54.66 ± 1.18 <sup>Ba</sup>  | 76.83 ± 1.47 <sup>Ba</sup> | 90.40 ± 0.38 <sup>Ba</sup> |
| WPI: inulin =2:1 | 13.84 ± 1.25 <sup>Aa</sup> | 34.74 ± 2.53 <sup>Ab</sup> | 64.78 ± 1.81 <sup>Ab</sup> | 77.19 ± 1.11 <sup>Ab</sup> | 29.05 ± 1.12 <sup>Bb</sup>  | 52.17 ± 1.66 <sup>Bb</sup>  | 74.24 ± 2.15 <sup>Bb</sup> | 89.27 ± 0.47 <sup>Bb</sup> |
| WPI: inulin =1:1 | 5.17 ± 0.47 <sup>Ab</sup>  | 24.55 ± 1.24 <sup>Ac</sup> | 53.05 ± 2.83 <sup>Ac</sup> | 67.77 ± 1.87 <sup>Ac</sup> | 23.73 ± 0.94 <sup>Bc</sup>  | 46.40 ± 0.89 <sup>Bc</sup>  | 67.03 ± 0.88 <sup>Bc</sup> | 84.40 ± 1.14 <sup>Bc</sup> |
| WPI: inulin =1:2 | 1.81 ± 0.18 <sup>Ac</sup>  | 13.70 ± 1.20 <sup>Ad</sup> | 39.57 ± 2.79 <sup>Ad</sup> | 52.42 ± 3.11 <sup>Ad</sup> | 19.30 ± 0.92 <sup>Bd</sup>  | 39.14 ± 1.10 <sup>Bd</sup>  | 62.83 ± 1.54 <sup>Bd</sup> | 81.93 ± 1.80 <sup>Bd</sup> |
| WPI: inulin =1:3 | 1.02 ± 0.04 <sup>Ad</sup>  | 7.72 ± 0.78 <sup>Ae</sup>  | 31.41 ± 1.20 <sup>Ae</sup> | 43.56 ± 1.29 <sup>Ae</sup> | 19.26 ± 1.55 <sup>Bd</sup>  | 32.12 ± 1.40 <sup>Be</sup>  | 57.70 ± 2.43 <sup>Be</sup> | 77.68 ± 1.26 <sup>Be</sup> |

Different uppercase letters denote significant difference at  $P < 0.05$  in DPPH or ABTS scavenging ability between native and dry-heated samples at same concentration and same whey protein and inulin ratio; Completely different lowercase letters denote significant difference at  $P < 0.05$  in DPPH or ABTS scavenging ability between samples with different whey protein and inulin ratios at same concentration for native or dry-heated samples.
